# Supplementary material
Source: HighWire-hosted journal article supplement (https://www.annfammed.org/content/suppl/2011/09/08/9.5.392)
Supplement: Crosson_Supp_Fig.pdf [file Crosson_Supp_Fig.pdf]

**Online Supplementary Material**

Crosson JC, Etz RS, Wu S, Straus SG, Eisenman D, Bell DS. Meaningful use of electronic prescribing in 5 exemplar primary care practices. *Ann Fam Med.* 2011;9(5):392-397.

<http://www.annfammed.org/cgi/content/full/9/5/392/DC1>

**Supplemental Figure 1. Prescription-sized handout explaining electronic prescribing to patients and pharmacists**

<Clinic Name and Logo>

To Our Patients:

Our practice is committed to the safety, security and accuracy of your prescriptions. Prescriptions generated and sent via the computer have been shown to reduce medication errors. It should also save you time by giving your prescription a head start to the pharmacy. This is why we have been sending your prescriptions, both new and renewals, electronically to your pharmacy using a secure network.

Please show your pharmacist this card so that he or she is aware that your prescription(s) have been sent electronically and have been received by your pharmacy computer or fax.

Thank you.

<Clinic Name and Logo>

Dear Pharmacist:

My prescription(s) have been sent to your computer electronically, not by fax or phone. My doctor uses electronic prescribing for both my new prescriptions and for renewals. Please note that my doctor prefers all renewals to be sent electronically to the computer in order to respond to your request within 24 to 48 hours. Over 98% of electronic renewal requests are processed within 24 hours.

If your pharmacy is enabled for electronic prescribing, please check your computer system for my prescriptions. Even when you send a fax for a renewal request, my doctor will respond electronically. Please do not re-fax a request to my doctor unless it has been 48 hours since the original request was sent.

Thank you.
